# Supplementary material for: Thermally Evaporated Copper Iodide Hole-Transporter for Stable CdS/CdTe Thin-Film Solar Cells
Source: MDPI journal article supplement (doi:10.3390/nano12142507), 2022-07-21
Supplement: s1 [file s1]

## Supporting Information

# Thermally Evaporated Copper Iodide Hole-Transporter for Stable CdS/CdTe Thin-Film Solar Cells

Thuraisamykurukkal Thivakarasarma <sup>1,2</sup>, Adikari Arachchige Isuru Lakmal <sup>3,4</sup>, Buddhika Senarath Dassanayake <sup>3,4</sup>, Dhayalan Velauthapillai <sup>2,\*</sup> and Punniamoorthy Ravirajan <sup>1,\*</sup>

<sup>1</sup> Clean Energy Research Laboratory, Department of Physics, University of Jaffna, Jaffna 40000, Sri Lanka; tsarma1990@gmail.com

<sup>2</sup> Faculty of Engineering and Science, Western Norway University of Applied Sciences, P.O. Box 7030, 5020 Bergen, Norway

<sup>3</sup> Postgraduate Institute of Science, University of Peradeniya, Peradeniya 20400, Sri Lanka; aaisurulakmal@gmail.com (A.A.I.L.); buddhikad@pdn.ac.lk (B.S.D.)

<sup>4</sup> Department of Physics, University of Peradeniya, Peradeniya 20400, Sri Lanka

\* Correspondence: prvirajan@univ.jfn.ac.lk (P.R.); dhayalan.velauthapillai@hvl.no (D.V.)

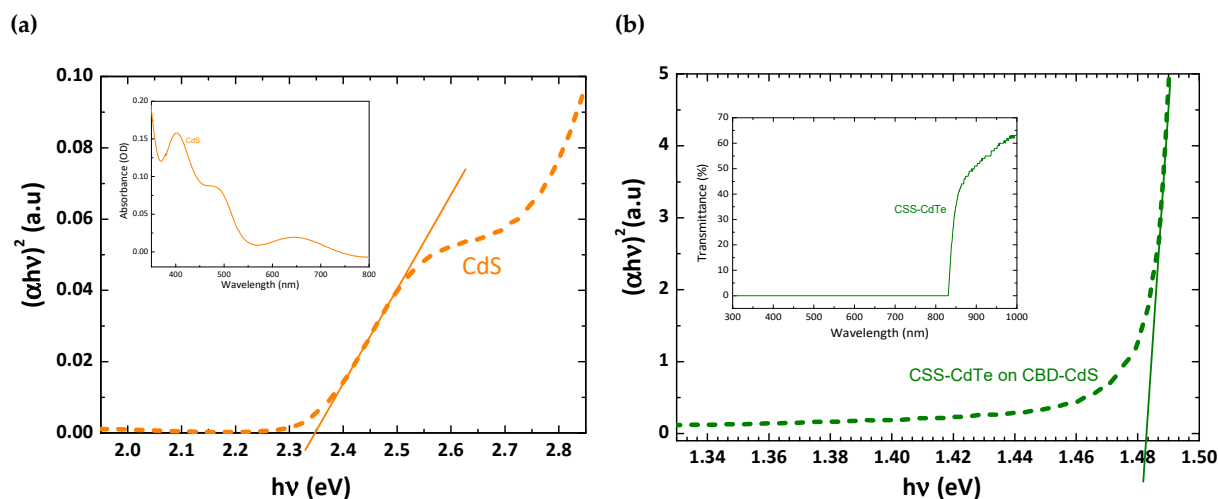

**Figure S1:** Optical absorption spectra of (a) Chemically deposited CdS film and (b) closed space sublimated CdTe film.

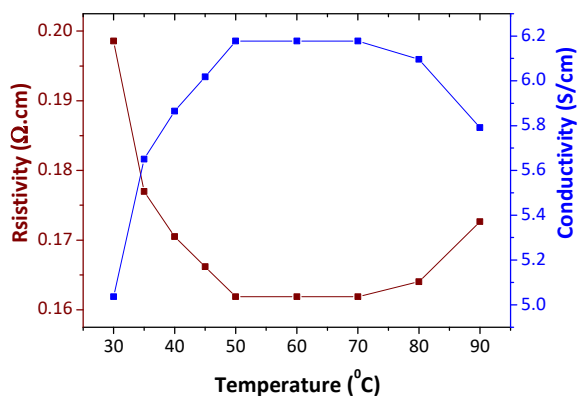

**Figure S2:** Temperature dependant electrical property of thermally evaporated CuI.

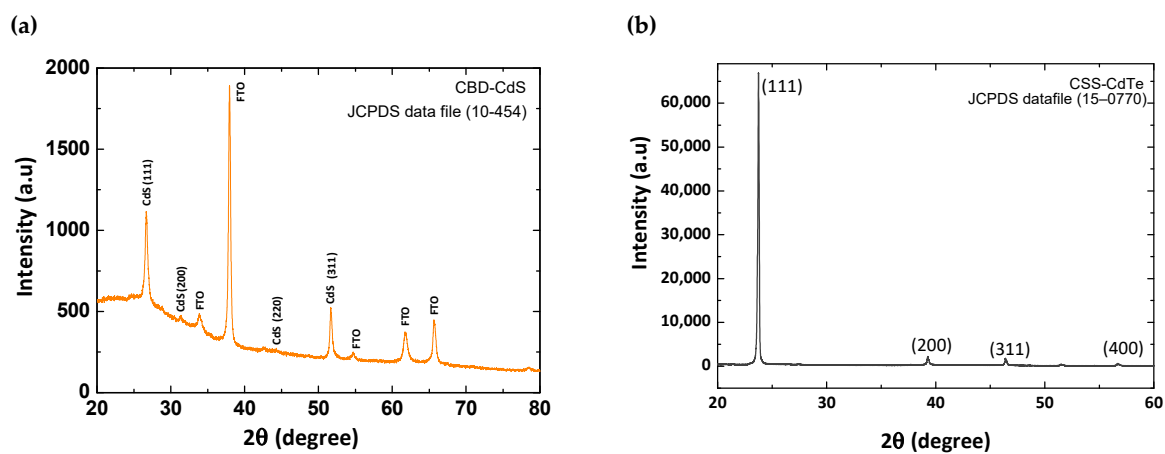

Figure S3: XRD pattern of (a) CBD-CdS and (b) CSS-CdTe.

Table S1: Average crystallite size of CBD-CdS and CSS-CdTe.

| Film     | Average crystallite size (nm) |
|----------|-------------------------------|
| CBD-CdS  | 18.20                         |
| CSS-CdTe | 45.47                         |

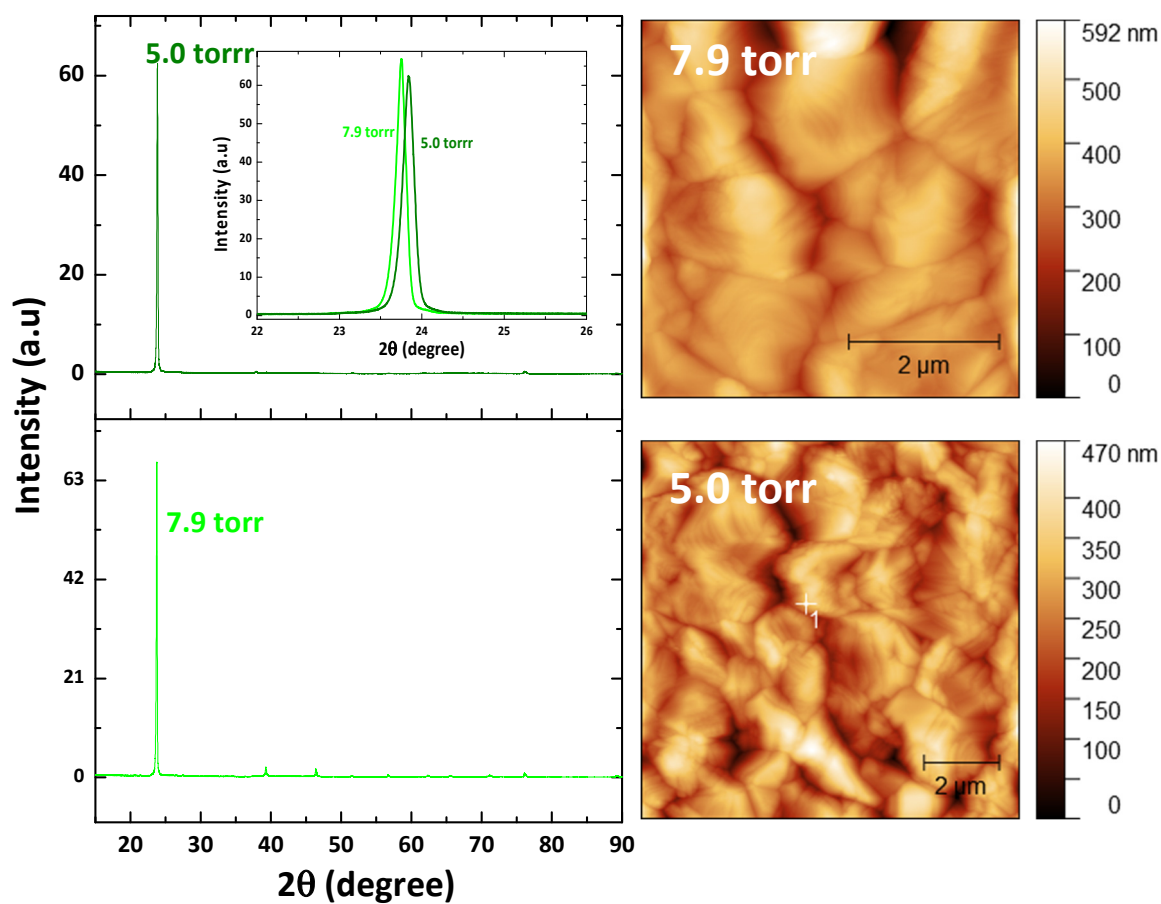

Figure S4: XRD pattern and AFM Topography images of CSS-CdTe with different fabrication parameter

Table S2: Structural parameters of CSS-CdTe with different fabrication parameter.

| Vacuum Pressure | Lattice Parameter (Å) | Crystallite size D (nm) | Micro strain $\epsilon$ ( $10^{-3}$ ) |
|-----------------|-----------------------|-------------------------|---------------------------------------|
| 7.9 torr        | 6.49                  | 50.62                   | 3.33                                  |
| 5.0 torr        | 6.46                  | 45.47                   | 3.69                                  |

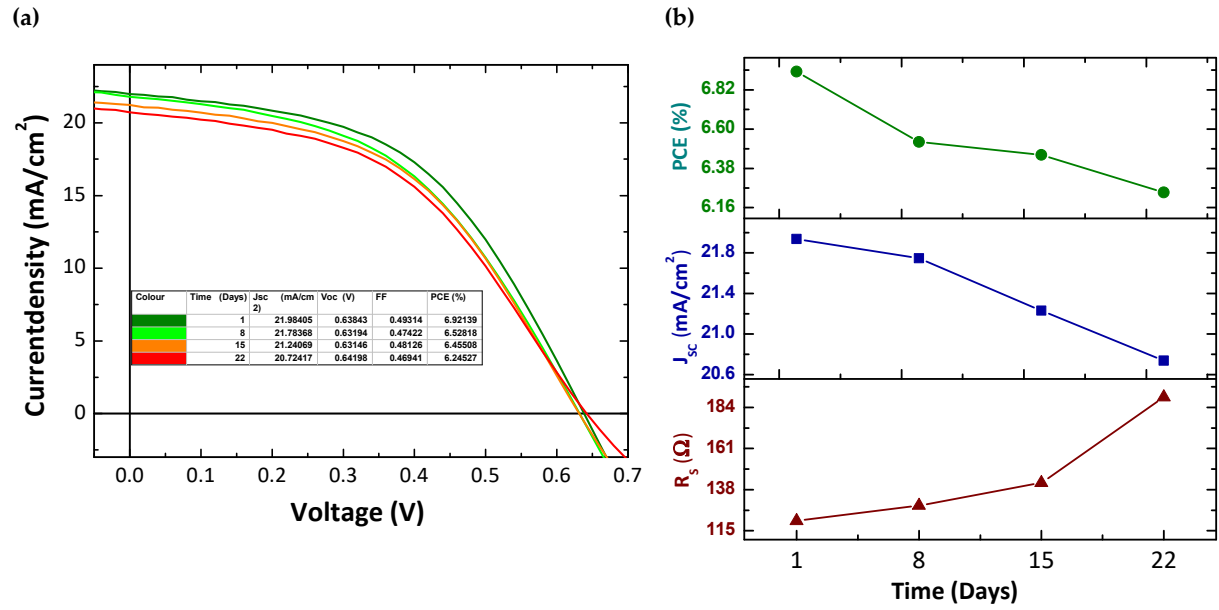

Figure S5: (a) J-V characteristic and (b) Variation of photovoltaic parameters of CdS/CdTe/CuI/Au solar cells with time.
